# Supplementary material for: Quantification of Total Phenols and Antioxidants in Coffee Samples of Different Origins and Evaluation of the Effect of Degree of Roasting on Their Levels
Source: Molecules. 2022 Feb 28;27(5):1591. doi: 10.3390/molecules27051591 (PMC8912094; doi:10.3390/molecules27051591)
Supplement: Supplementary file 1 [file molecules-27-01591-s001.zip › molecules-1561451-supplementary.pdf]

## Article

# Quantification of Total Phenols and Antioxidants in Coffee Samples of Different Origins and Evaluation of the Effect of Degree of Roasting on their Levels

Lilian Alnsour <sup>1</sup>, Reem Issa <sup>1\*</sup>, Shady Awwad <sup>2</sup>, Dima Albals <sup>3</sup>, and Idrees F. Al-Momani <sup>4</sup>

<sup>1</sup> Department of Pharmaceutical Sciences, Pharmacological and Diagnostic Research Center (PDRC), Faculty of Pharmacy, Al-Ahliyya Amman University, Amman, Jordan

<sup>2</sup> Department of Pharmaceutical Chemistry & Pharmacognosy, Applied Science Private University, Amman, Jordan

<sup>3</sup> Department of Medicinal Chemistry and Pharmacognosy, Faculty of Pharmacy, Yarmouk University, Irbid, Jordan

<sup>4</sup> Department of Chemistry, Faculty of Science, Yarmouk University, Irbid, Jordan

\*Corresponding author: r.issa@ammanu.edu.jo

**Table S1:** The distribution of *Coffea arabica* samples (52) obtained from the Jordanian market according to their origin and roasting degree. Roasting temperatures for light roasted =155-165 °C, for medium roasted= 175-185°C, and for dark roasted= 205-215°C.

| Sample Origin  | Number of samples | Degree of roasting/type | Concentration of extract |
|----------------|-------------------|-------------------------|--------------------------|
| Kenya          | 2*                | Green                   | 5mg/mL                   |
|                | 2*                | Light                   | 5mg/mL                   |
|                | 2*                | Medium roasted          | 5mg/mL                   |
|                | 2*                | Dark                    | 5mg/mL                   |
|                | 1                 | Over roasted***         | 5mg/mL                   |
| Saudi Arabia** | 1                 | Green                   | 5mg/mL                   |
| Ethiopia       | 3*                | Green                   | 5mg/mL                   |
|                | 1                 | Light                   | 5mg/mL                   |
|                | 1                 | Medium roasted          | 5mg/mL                   |
|                | 1                 | Dark                    | 5mg/mL                   |
| Brazil         | 2*                | Green                   | 5mg/mL                   |
|                | 4*                | Light                   | 5mg/mL                   |
|                | 4*                | Medium roasted          | 5mg/mL                   |
|                | 4*                | Dark                    | 5mg/mL                   |
|                |                   |                         |                          |

|          |    |                 |        |
|----------|----|-----------------|--------|
|          | 1  | Over roasted*** | 5mg/mL |
| Colombia | 3* | Green           | 5mg/mL |
|          | 4* | Light           | 5mg/mL |
|          | 4* | Medium roasted  | 5mg/mL |
|          | 5* | Dark            | 5mg/mL |
|          | 1  | Over roasted*** | 5mg/mL |
| India**  | 3* | Light           | 5mg/mL |
|          | 1  | Over roasted*** | 5mg/mL |

\*Samples of the same origin and roasting degree that were purchased from different stores across Jordan were blended to homogenize results. \*\*Indian and Saudi coffee samples were excluded from the graphs due to lack of samples with varying roasting degrees available. \*\*\*Results for over-roasted samples were combined with those of dark roasted coffee samples for the same origin.

Table S2: The Average concentration (mg/g), SD, SE, Min, Max, and confidence interval for GAE in coffee beans obtained from the Jordanian market.

| Descriptives |    |         |                |            |                                  |             |         |         |
|--------------|----|---------|----------------|------------|----------------------------------|-------------|---------|---------|
| average_GAE  |    |         |                |            |                                  |             |         |         |
|              | N  | Mean    | Std. Deviation | Std. Error | 95% Confidence Interval for Mean |             | Minimum | Maximum |
|              |    |         |                |            | Lower Bound                      | Upper Bound |         |         |
| "Green"      | 4  | 15.5850 | 1.65800        | 0.82900    | 12.9468                          | 18.2232     | 13.82   | 17.25   |
| "Light"      | 4  | 15.5875 | 3.99675        | 1.99838    | 9.2278                           | 21.9472     | 9.84    | 19.05   |
| "Medium"     | 4  | 16.5450 | 5.28920        | 2.64460    | 8.1287                           | 24.9613     | 12.31   | 24.28   |
| "Dark"       | 4  | 14.9225 | 5.23308        | 2.61654    | 6.5955                           | 23.2495     | 9.44    | 21.41   |
| Total        | 16 | 15.6600 | 3.89532        | 0.97383    | 13.5843                          | 17.7357     | 9.44    | 24.28   |

Table S3: The Average concentration (mg/g), SD, SE, Min, Max, and confidence interval for TEAC in coffee beans obtained from the Jordanian market.

| Descriptives |   |        |                |            |                                  |             |         |         |
|--------------|---|--------|----------------|------------|----------------------------------|-------------|---------|---------|
| average_TEAC |   |        |                |            |                                  |             |         |         |
|              | N | Mean   | Std. Deviation | Std. Error | 95% Confidence Interval for Mean |             | Minimum | Maximum |
|              |   |        |                |            | Lower Bound                      | Upper Bound |         |         |
| "Green"      | 4 | 1.0675 | 0.18081        | 0.09040    | 0.7798                           | 1.3552      | 0.88    | 1.29    |
| "Light"      | 4 | 0.9525 | 0.09430        | 0.04715    | 0.8025                           | 1.1025      | 0.84    | 1.07    |
| "Medium"     | 4 | 0.7325 | 0.48459        | 0.24229    | -0.0386                          | 1.5036      | 0.08    | 1.13    |

---

|        |    |        |         |         |        |        |      |      |
|--------|----|--------|---------|---------|--------|--------|------|------|
| "Dark" | 4  | 0.4900 | 0.07528 | 0.03764 | 0.3702 | 0.6098 | 0.43 | 0.60 |
| Total  | 16 | 0.8106 | 0.32927 | 0.08232 | 0.6352 | 0.9861 | 0.08 | 1.29 |
